# Supplementary material for: Enhanced gas sensing properties of ZnO/SnO2hierarchical architectures by glucose-induced attachment
Source: Royal Society of Chemistry journal article supplement (doi:10.1039/c0ce00244e), 2010-11-25
Supplement: c0ce00244e.pdf [file c0ce00244e.pdf]

## Supporting Information For

# Enhanced Gas Sensing Properties of ZnO/SnO<sub>2</sub> Hierarchical Architectures by Glucose-induced Attachment

Cheng Chao Li,<sup>a, b</sup> Xiao Ming Yin<sup>b</sup> and Tai Hong Wang<sup>b\*</sup>

<sup>a</sup> Key Laboratory for Micro-Nano Optoelectronic Devices of Ministry of Education and State Key Laboratory of Chemo/Biosensing and Chemometrics, Hunan University, Changsha, 410082, P. R. China

<sup>b</sup> Department of Chemical and Biomolecular Engineering, Faculty of Engineering, National University of Singapore, 10 Kent Ridge Crescent, Singapore 119260

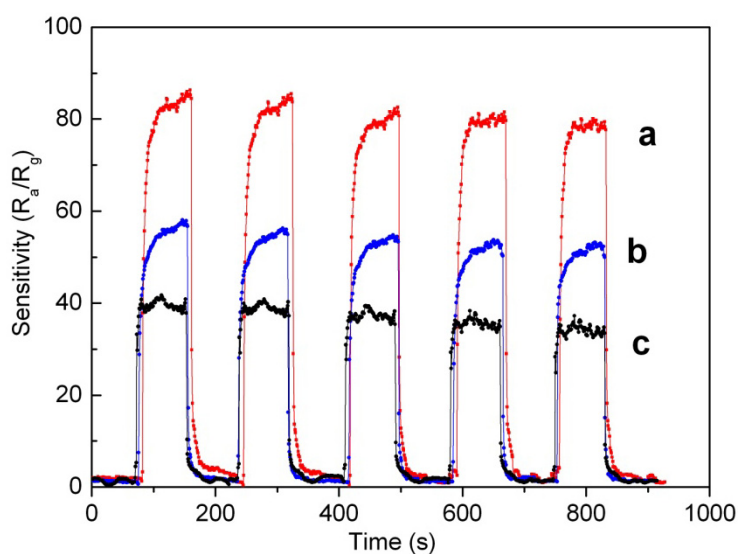

Figure S11. Reproducibility characterization of the sensors when exposed to 300 ppm ethanol.

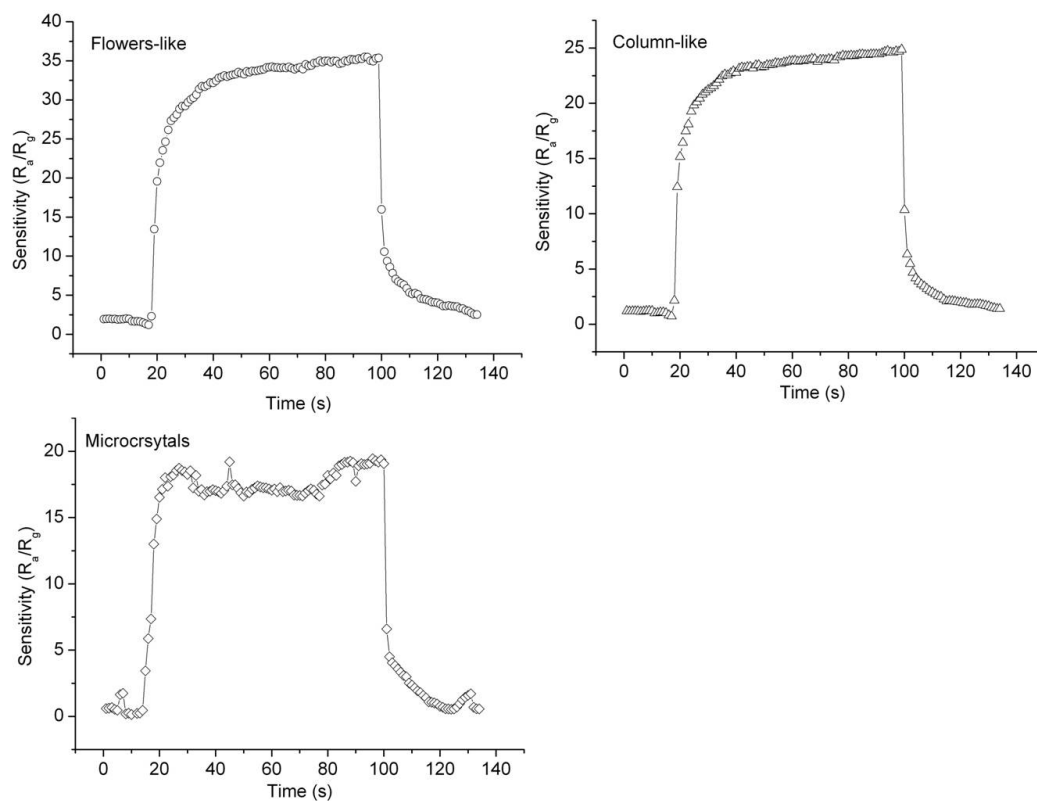

Figure SI2. Enlarged response and recovery processes of the ZnO/SnO<sub>2</sub> nanostructures (a. flowers-like, b. column-like, c. microcrystals) when exposed to 100 ppm ethanol.

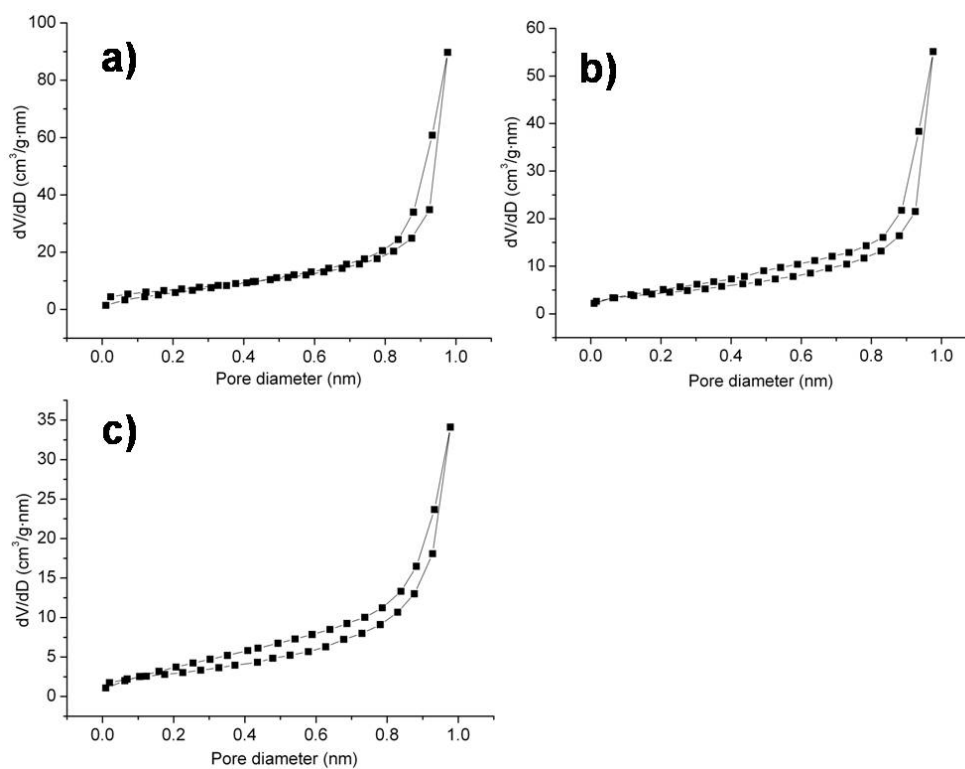

Figure SI3. Nitrogen physisorption isotherm curves of the ZnO/SnO<sub>2</sub> nanostructures (a. flowers-like, b. column-like, c. microcrystals).

SI4: Flowers-like nanostructures

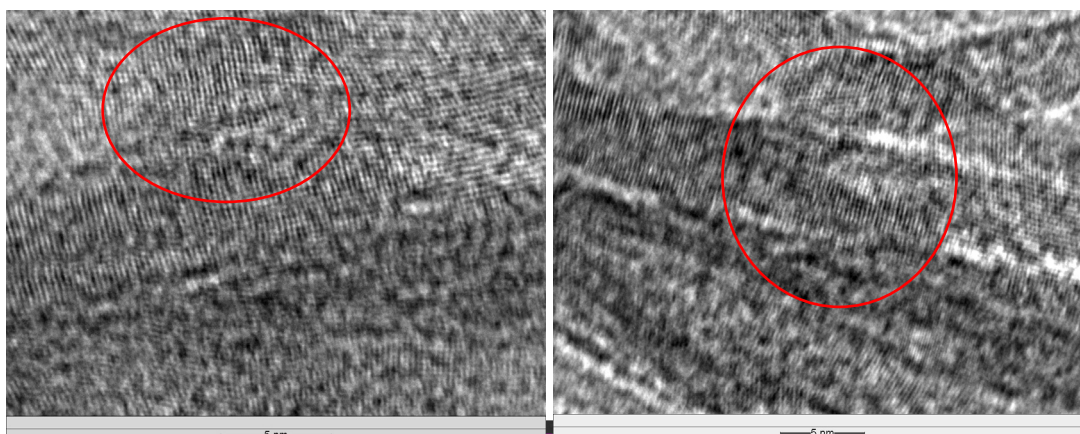

**Red: Oxygen**  
**Blue: Tin**  
**Green: Zn**

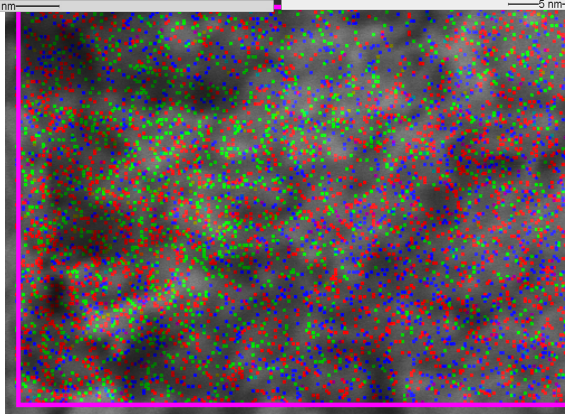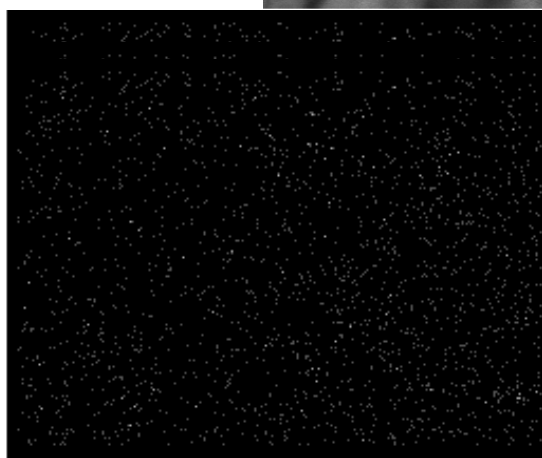

Zn Ka1

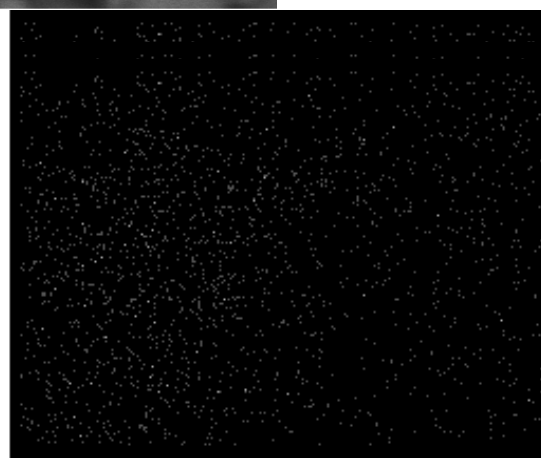

Sn La1

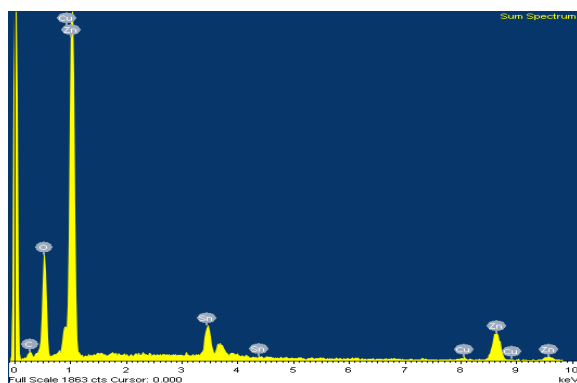

| Element | Weight % | Atomic % |
|---------|----------|----------|
| O K     | 27.20    | 62.55    |
| Zn L    | 58.85    | 33.12    |
| Sn L    | 13.96    | 4.33     |
| Totals  | 100.00   |          |

## Nanoplate-stacking column

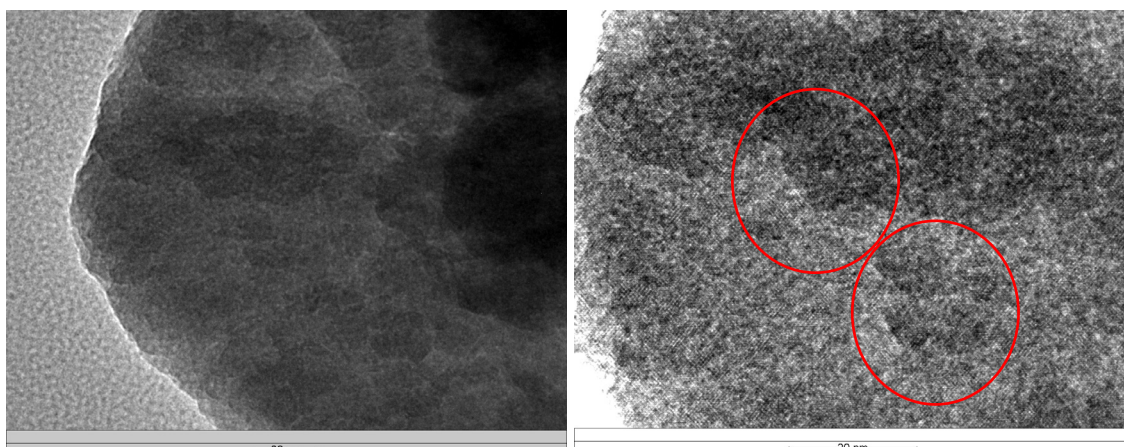

**Red: Oxygen**  
**Blue: Tin**  
**Green: Zn**

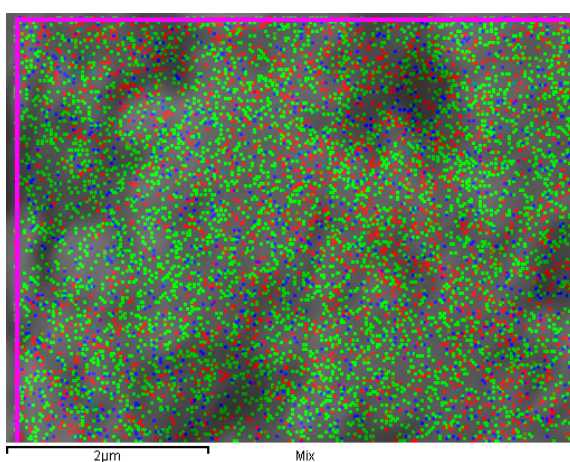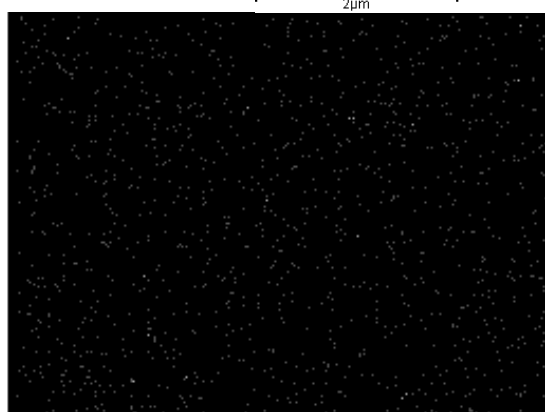

Zn Kα1

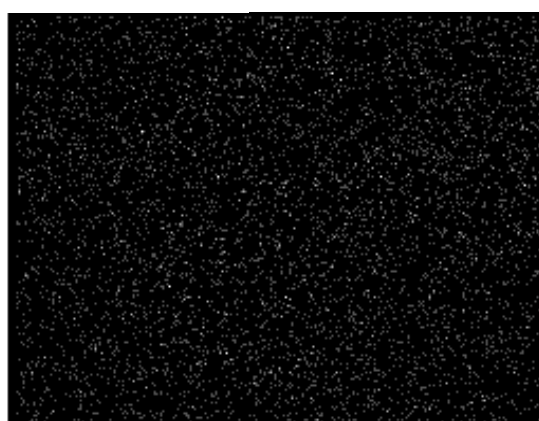

Sn Lα1

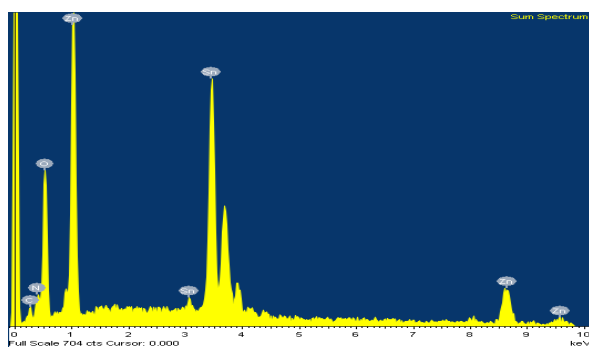

| Element | Weight% | Atomic% |
|---------|---------|---------|
| O K     | 29.02   | 64.01   |
| Zn L    | 61.37   | 33.13   |
| Sn L    | 9.61    | 2.86    |
| Totals  | 100.00  |         |

Octahedral particles:

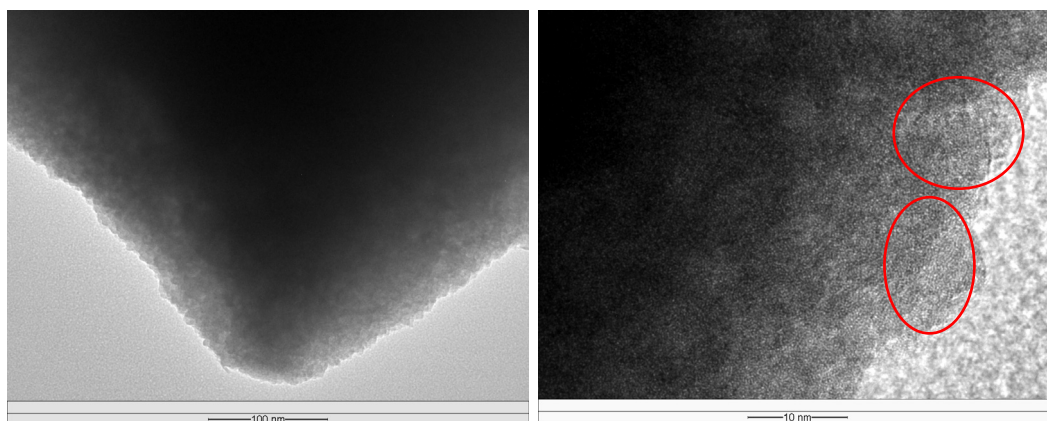

Red: Oxygen

Blue: Tin

Green: Zn

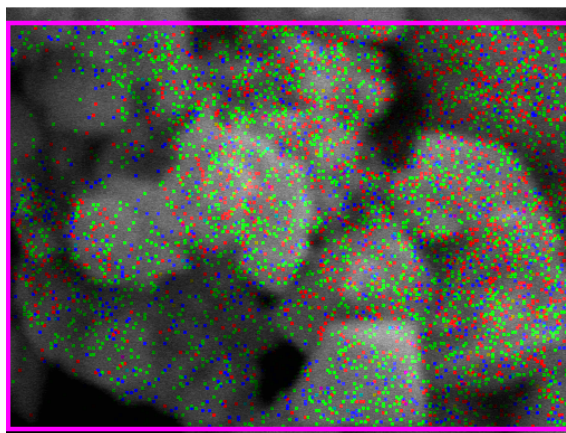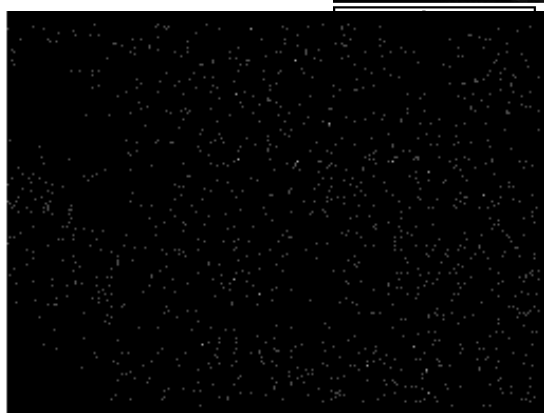

Zn Kα1

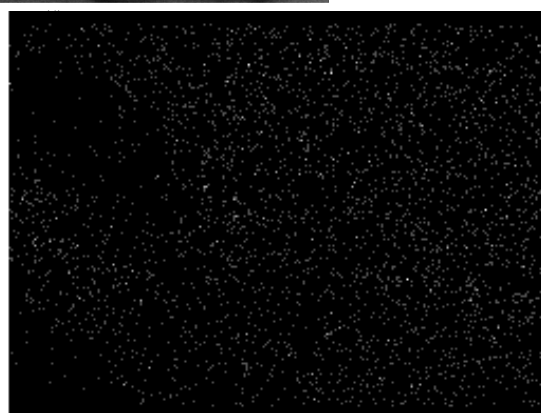

Sn Lα1

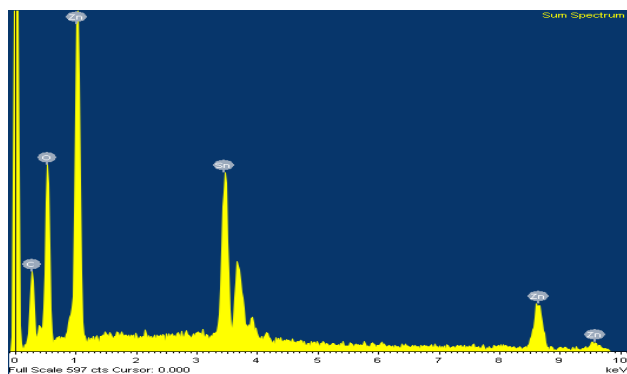

| Element | Weight% | Atomic% |
|---------|---------|---------|
| O K     | 35.22   | 72.99   |
| Zn L    | 39.12   | 19.84   |
| Sn L    | 25.66   | 7.17    |
| Totals  | 100.00  |         |
